# Supplementary material for: In Vivo Detection of Laminar and Peripapillary Scleral Hypercompliance in Early Monkey Experimental Glaucoma
Source: PubMed Central journal article supplement — Invest Ophthalmol Vis Sci. 2016 Jul 13;57(9):OCT388–403. doi: 10.1167/iovs.15-18666 (PMC4968772; doi:10.1167/iovs.15-18666), 2016-07-13
Supplement: i1552-5783-57-9-OCT388-s01.pdf [file i1552-5783-57-9-OCT388-s01.pdf]

| <sup>1</sup> Animal # | <sup>2</sup> CSLT MPD C/EG/Diff (µm) | <sup>3</sup> BMOD-BM C/EG/Diff (µm) | <sup>4</sup> ALCSD-BM C/EG/Diff (µm) | <sup>5</sup> ALCSD-BMO C/EG/Diff (µm) | <sup>6</sup> PLTT C/EG/Diff (µm) | <sup>7</sup> MRW C/EG/Diff (µm) | <sup>8</sup> RNFLT C/EG/Diff (µm) |
|-----------------------|--------------------------------------|-------------------------------------|--------------------------------------|---------------------------------------|----------------------------------|---------------------------------|-----------------------------------|
| 1                     | 16.3/-55.3/-71.6                     | 11.6/0.6/-11.0                      | -5.9/-16.0/-10.1                     | -17.7/-15.4/2.3                       | -7.9/-102.0/-94.1                | -8.4/-48.6/-40.2                | -3.4/-10.8/-7.4                   |
| 2                     | -20.6/-43.6/-23.0                    | -3.5/-22.5/-19.0                    | 1.3/-124.2/-125.5                    | 3.3/-94.3/-97.6                       | 28.0/--/--                       | 8.6/-47.2/-55.8                 | -3.7/--/--                        |
| 3                     | -9.6/-62.7/-53.1                     | 0.8/-11.0/-11.8                     | -1.7/-62.5/-60.8                     | -2.7/-51.0/-48.3                      | -1.9/-28.8/-26.9                 | -6.9/-24.1/-17.2                | -11.0/-16.2/-5.2                  |
| 4                     | -29.3/-70.1/-40.8                    | 7.3/-17.5/-24.8                     | 2.2/-54.3/-56.5                      | -6.0/-37.3/-31.3                      | -0.6/-23.8/-23.2                 | -15.4/-52.5/-37.5               | 4.8/1.3/-3.5                      |
| 5                     | 10.4/-31.6/-42.0                     | -11.1/-12.4/-1.3                    | -30.6/-76.4/-45.8                    | -19.5/-64.1/-44.6                     | 1.0/-5.4/-6.4                    | -13.2/-27.8/-14.6               | -9.2/-6.8/2.4                     |
| 6                     | -5.9/-61.7/-55.8                     | -5.6/-26.8/-21.2                    | -18.3/-72.9/-54.6                    | -11.5/-46.2/-34.7                     | 1.7/-66.6/-68.3                  | -9.0/-80.2/-71.2                | -1.1/-29.4/-28.3                  |
| 7                     | -4.5/-35.5/-31.0                     | 3.3/-17.2/-20.5                     | -4.4/-89.2/-84.8                     | -7.3/-71.2/-63.9                      | -51.5/-46.7/4.8                  | -30.2/-75.6/-45.4               | -8.4/-32.8/-24.4                  |
| 8                     | -8.9/-53.3/-44.4                     | 10.5/-16.1/-26.6                    | 77.2/0.3/-76.9                       | 68.4/16.7/-51.7                       | -77.3/-68.1/9.2                  | -1.4/-38.6/-37.2                | 10.7/-3.8/-14.5                   |
| 9                     | 8.3/-37.7/-46.0                      | 14.0/-8.0/-22.0                     | 56.9/-9.5/-66.4                      | 44.8/-1.4/-46.2                       | -5.7/-8.4/-2.7                   | 3.8/-17.4/-21.2                 | -0.9/-8.1/-7.2                    |
| 10                    | -4.7/-62.6/-57.9                     | 11.5/3.7/-7.8                       | 34.2/-158.6/-192.8                   | 22.6/-161.0/-183.6                    | 2.4/28.7/26.3                    | 5.4/-67.9/-73.3                 | -1.1/-26.7/-25.6                  |
| 11                    | 8.5/-178.5/-187.0                    | -2.0/-96.8/-94.8                    | -20.3/-271.6/-251.3                  | -16.3/-173.3/-157.0                   | 13.5/-109.5/-123.0               | -4.0/-153.7/-149.7              | -4.7/-53.8/-49.1                  |
| 12                    | 0.3/-31.8/-32.1                      | 1.8/-6.4/-8.2                       | -44.0/-127.4/-83.4                   | -47.6/-120.3/-72.7                    | 46.8/4.6/-42.2                   | 4.3/-52.3/-56.6                 | 8.8/10.6/1.8                      |
| 13                    | 0.8/-151.7/-152.5                    | -17.1/-75.5/-58.4                   | -36.3/-311.6/-275.3                  | -19.3/-236.3/-217.0                   | -8.4/-49.9/-41.5                 | -11.3/-134.4/-123.1             | -4.5/0.1/4.6                      |
| 14                    | -16.7/-282.9/-266.2                  | -10.0/-56.5/-46.5                   | 9.7/-360.7/-370.4                    | 20.4/-303.9/-324.3                    | -40.8/-188.6/-147.8              | -3.6/-186.2/-182.6              | -2.5/--/--                        |
| 15                    | -3.1/-404.4/-401.3                   | 5.8/-87.5/-93.3                     | 25.8/-243.9/-269.7                   | 17.9/-142.1/-160.0                    | -133.1/-216.3/-83.2              | -109.6/-184.4/-74.8             | -15.8/-53.0/-37.2                 |

774

775

<sup>1</sup>Animals order (1 – 15) was determined by the magnitude of EG vs. control eye *Acute Compliance* difference in *ALCSD-BM* (Supplemental Table 2).

776

<sup>2</sup>Mean Position of the Disc (MPD) change from baseline at confocal scanning laser tomography (CSLT) onset.

777

778

<sup>3</sup>*BMOD-BM* – BMO depth relative to the peripheral Bruch's Membrane (BM) reference plane 1500 µm from the Bruch's Membrane Opening (BMO) centroid. Negative effect size for *BMOD-BM* indicates posterior deformation; positive effect size for *BMOD-BM* indicates anterior deformation.

779

780

<sup>4</sup>*ALCSD-BM* – Anterior lamina cribrosa surface depth (ALCSD) relative to the BM reference plane. Negative effect size for *ALCSD-BM* indicates posterior deformation; positive effect size for *ALCSD-BM* indicates anterior deformation.

781

782

<sup>5</sup>*ALCSD-BMO* – Anterior lamina cribrosa surface depth (ALCSD) relative to the BMO reference plane. Negative effect size for *ALCSD-BMO* indicates posterior deformation; positive effect size for *ALCSD-BMO* indicates anterior deformation.

783

<sup>6</sup>*PLTT* – Prelaminar Tissue Thickness.

784

<sup>7</sup>*MRW* – Minimum Rim Width.

785

<sup>8</sup>*RNFLT* – Retinal nerve fiber layer thickness 1200 µm from the BMO centroid.

786

'--' – Parameter could not be measured due to poor image quality at time of imaging.

787

**Supplemental Table 1. Fixed Deformation at CSLT-detected Experimental Glaucoma (EG) Onset.**

| <sup>1</sup> Animal #          | <sup>2</sup> <i>BMOD-BM</i><br>C/EG/Diff<br>(µm) | <sup>3</sup> <i>ALCSD-BM</i><br>C/EG/Diff<br>(µm) | <sup>4</sup> <i>ALCSD-BMO</i><br>C/EG/Diff<br>(µm) | <sup>5</sup> <i>PLTT</i><br>C/EG/Diff<br>(µm) | <sup>6</sup> <i>MRW</i><br>C/EG/Diff<br>(µm) | <sup>7</sup> <i>RNFLT</i><br>C/EG/Diff<br>(µm) |
|--------------------------------|--------------------------------------------------|---------------------------------------------------|----------------------------------------------------|-----------------------------------------------|----------------------------------------------|------------------------------------------------|
| 1                              | -8.2/- <b>6.5</b> /1.7                           | -19.2/ <b>6.1</b> /25.3                           | -8.0/14.9/22.9                                     | -41.5/-47.5/-6.0                              | -17.7/-16.7/1.0                              | -1.6/-3.0/-1.4                                 |
| 2                              | -10.2/-13.7/-3.5                                 | -17.0/- <b>0.2</b> /16.8                          | -5.4/6.7/12.1                                      | -6.1/--/--                                    | -10.1/ <b>7.4</b> /17.5                      | 1.8/--/--                                      |
| 3                              | -30.3/-30.5/-0.2                                 | -34.9/-27.4/7.5                                   | -3.3/4.4/7.7                                       | -22.1/-32.0/-9.9                              | -11.6/-20.3/-8.7                             | -2.6/ <b>6.0</b> /8.6                          |
| 4                              | -37.6/-38.9/-1.3                                 | -21.7/-23.4/-1.7                                  | 15.1/14.6/-0.5                                     | -33.2/-23.8/9.4                               | -23.7/-25.7/-2.0                             | -3.5/-2.4/1.1                                  |
| 5                              | -39.3/-34.1/5.2                                  | -43.3/-49.8/-6.5                                  | -4.1/-15.7/-11.6                                   | -46.2/-28.5/17.7                              | -27.7/-23.9/3.8                              | -5.0/-3.4/1.6                                  |
| 6                              | -34.0/-50.4/-16.4                                | -32.9/-72.6/-39.7                                 | 0.8/-22.2/-23.0                                    | -25.4/-17.3/8.1                               | -13.1/-10.0/3.1                              | -3.3/-3.6/-0.3                                 |
| 7                              | -21.6/-27.0/-5.4                                 | -42.2/-83.7/-41.5                                 | -20.2/- <b>56.3</b> /-36.1                         | 11.7/-26.8/-38.5                              | -11.8/-21.7/-9.9                             | -1.7/-0.3/1.4                                  |
| 8                              | -59.0/- <b>82.0</b> /-23.0                       | -90.1/- <b>140.5</b> /-50.4                       | -32.4/- <b>58.6</b> /-26.2                         | -38.0/-53.9/-15.9                             | -27.9/- <b>39.1</b> /-11.2                   | -10.5/-3.7/6.8                                 |
| 9                              | -41.4/- <b>61.4</b> /-20.0                       | -44.1/- <b>106.3</b> /-62.2                       | -2.7/- <b>45.4</b> /-42.7                          | -28.5/-28.3/0.2                               | -18.9/-29.0/-10.1                            | -0.2/0.0/0.2                                   |
| 10                             | -26.6/-51.9/-25.3                                | -44.3/- <b>121.4</b> /-77.1                       | -17.2/- <b>69.9</b> /-87.1                         | -16.0/- <b>70.5</b> /-54.5                    | -8.5/- <b>30.8</b> /-22.3                    | -3.9/-6.0/-2.1                                 |
| 11                             | -25.4/-11.6/13.8                                 | -29.9/- <b>118.5</b> /-88.6                       | -5.5/- <b>107.0</b> /-101.5                        | -24.0/5.1/29.1                                | -17.6/- <b>4.3</b> /13.3                     | -2.3/--/--                                     |
| 12                             | -34.3/-41.6/-7.3                                 | -26.9/- <b>118.0</b> /-91.1                       | 7.1/- <b>75.8</b> /-82.9                           | -54.0/-33.5/20.5                              | -29.0/-17.4/11.6                             | -7.8/ <b>4.7</b> /12.5                         |
| 13                             | -32.6/- <b>76.3</b> /-43.7                       | -32.1/- <b>132.7</b> /-100.6                      | 0.6/- <b>56.5</b> /-57.1                           | -14.8/- <b>67.1</b> /-52.3                    | -9.3/-27.6/-18.3                             | -4.9/-7.8/-2.9                                 |
| 14                             | -47.4/- <b>83.4</b> /-36.0                       | -78.3/- <b>182.6</b> /-104.3                      | -30.8/- <b>99.8</b> /-69.0                         | 9.1/-19.9/-29.0                               | -21.7/-25.4/-3.7                             | -1.0/--/--                                     |
| 15                             | -52.4/- <b>97.2</b> /-44.8                       | -68.6/- <b>206.2</b> /-137.6                      | -16.6/- <b>123.3</b> /-106.7                       | -27.2/-42.9/-15.7                             | -17.5/- <b>39.0</b> /-21.5                   | 1.7/--/--                                      |
| <sup>8</sup> Control Eye Range | [-8.2, -59.0]                                    | [-17.0, -90.1]                                    | [15.1, -32.4]                                      | [11.7, -54.0]                                 | [-8.5, -29.0]                                | [1.8, -10.5]                                   |

788

789

<sup>1</sup>Animals ordered by the magnitude of *Acute Compliance* difference in *ALCSD-BM* between control and EG eyes.

790

791

792

<sup>2</sup>*BMOD-BM* – Bruch's Membrane Opening (BMO) depth relative to the peripheral Bruch's Membrane (BM) reference plane 1500 µm from the BMO centroid. Negative effect size for *BMOD-BM* indicates posterior deformation; positive effect size for *BMOD-BM* indicates anterior deformation.

793

794

<sup>3</sup>*ALCSD-BM* – Anterior lamina cribrosa surface depth (ALCSD) relative to the BM reference plane. Negative effect size for *ALCSD-BM* indicates posterior deformation; positive effect size for *ALCSD-BM* indicates anterior deformation.

795

796

<sup>4</sup>*ALCSD-BMO* – Anterior lamina cribrosa surface depth (ALCSD) relative to the BMO reference plane. Negative effect size for *ALCSD-BMO* indicates posterior deformation; positive effect size for *ALCSD-BMO* indicates anterior deformation.

797

<sup>5</sup>*PLTT* – Prelaminar tissue thickness.

798

<sup>6</sup>*MRW* – Minimum rim width.

799

<sup>7</sup>*RNFLT* – Retinal nerve fiber layer thickness 1200 µm from the BMO centroid.

800

<sup>8</sup>Control Eye Range – minimum and maximum *Acute Compliance* for each parameter across control eyes.

801

802

803

804

805

806

**EG Eye Bold Values** – EG eye *Acute Compliance* values which are outside of the control eye range for a given parameter (see above) are **Bold**. EG eyes demonstrating parameter values that are less **negative than** the control eye range are interpreted to represent a decrease in compliance. EG eyes demonstrating parameter values that are **more negative than** the control eye range are interpreted to represent an increase in compliance or "hypercompliance". Neural tissue swelling or a change in **the direction of acute** connective tissue **deformation** from posterior (**outward or negative**) to anterior (**inward or positive**) can confound these definitions **and should be interpreted with caution** (*ALCSD-BM* for Animal 1; *MRW* for Animal 2; and *RNFLT* for Animal 12).

807

'--' – Parameter could not be measured due to poor image quality at time of imaging.

808

809

**Supplemental Table 2. Acute Compliance at Confocal Scanning Laser Tomography (CSLT)-detected Experimental Glaucoma (EG) Onset.**

810

811

812
